# Supplementary material for: What Do Polish Parents and Caregivers Think of Dietary Supplements for Children Aged 3–12?
Source: MDPI journal article supplement (doi:10.3390/nu12103076), 2020-10-09
Supplement: s1 [file s1]

Table S 1. The value of the  $\rho$ -Spearman coefficient for the relationship between individual attitudes of caretakers (N=532)

| Statement (S) |                                                                                    | 1                                                                   | 2                                                               | 3                               | 4                                                                                  | 5                                                      | 6                                                                 | 7                                                                       | 8                                                                                                                        | 9                                                                       | 10                                                                                          | 11                                                               |
|---------------|------------------------------------------------------------------------------------|---------------------------------------------------------------------|-----------------------------------------------------------------|---------------------------------|------------------------------------------------------------------------------------|--------------------------------------------------------|-------------------------------------------------------------------|-------------------------------------------------------------------------|--------------------------------------------------------------------------------------------------------------------------|-------------------------------------------------------------------------|---------------------------------------------------------------------------------------------|------------------------------------------------------------------|
|               |                                                                                    | I have general knowledge on the subject of DS intended for children | In my opinion dietary supplement is an equivalent of medication | DS are foodstuff (type of food) | DS (ingredients of DS) can interact with medication and food consumed by the child | Dietary supplements can cause side effects in children | Taking DS in recommended doses is safe for the health of children | Administering DS to children can be one way of supplementing their diet | Taking DS in an uncontrollable manner (by children) can lead to an overdose of vitamins and minerals or other substances | Dietary supplements intended for children can have medicinal properties | Selected dietary supplements intended for children are effective in flu and cold prevention | Taking DS (by children) during illness can shorten its duration. |
| 1             | I have general knowledge on the subject of DS intended for children                | x                                                                   | -                                                               | -                               | 0,10                                                                               |                                                        | 0,16                                                              | 0,11                                                                    | 0,11                                                                                                                     |                                                                         | 0,10                                                                                        | -                                                                |
| 2             | In my opinion dietary supplement is an equivalent of medication                    | -                                                                   | x                                                               | -                               | -0,16                                                                              | -0,14                                                  | -                                                                 | -                                                                       | -                                                                                                                        | 0,25                                                                    | 0,19                                                                                        | 0,15                                                             |
| 3             | Dietary supplements are foodstuff (type of food)                                   | -                                                                   | -                                                               | x                               | 0,09                                                                               |                                                        | -                                                                 | 0,13                                                                    | -                                                                                                                        | 0,10                                                                    | -                                                                                           | -                                                                |
| 4             | DS (ingredients of DS) can interact with medication and food consumed by the child | 0,10                                                                | -0,16                                                           | 0,09                            | x                                                                                  | 0,55                                                   | -0,13                                                             | -                                                                       | 0,40                                                                                                                     | -                                                                       | -0,11                                                                                       | -                                                                |
| 5             | Dietary supplements can cause side effects in children                             | -                                                                   | -0,14                                                           | -                               | 0,55                                                                               | x                                                      | -0,23                                                             | -0,17                                                                   | 0,37                                                                                                                     | -                                                                       | -0,14                                                                                       | -0,12                                                            |
| 6             | Taking dietary supplements in recommended doses is safe for the health of          | 0,16                                                                | -                                                               | -                               | -0,13                                                                              | -0,23                                                  | x                                                                 | 0,53                                                                    | -                                                                                                                        | 0,33                                                                    | 0,47                                                                                        | 0,39                                                             |

|    |                                                                                                                          |      |      |      |       |       |      |      |   |      |      |      |
|----|--------------------------------------------------------------------------------------------------------------------------|------|------|------|-------|-------|------|------|---|------|------|------|
|    | children                                                                                                                 |      |      |      |       |       |      |      |   |      |      |      |
| 7  | Administering DS to children can be one way of supplementing their diet                                                  | 0,11 | -    | 0,13 | -     | -0,17 | 0,53 | x    | - | 0,34 | 0,43 | 0,39 |
| 8  | Taking DS in an uncontrollable manner (by children) can lead to an overdose of vitamins and minerals or other substances | 0,11 | -    | -    | 0,39  | 0,37  | -    | -    | x | -    | -    | -    |
| 9  | DS intended for children can have medicinal properties                                                                   | -    | 0,25 | 0,10 | -     | -     | 0,33 | 0,34 | - | x    | 0,49 | 0,48 |
| 10 | Selected dietary supplements intended for children are effective in flu and cold prevention                              | 0,10 | 0,19 | -    | -0,11 | -0,14 | 0,47 | 0,43 | - | 0,49 | x    | 0,69 |
| 11 | Taking DS (by children) during illness can shorten its duration.                                                         | -    | 0,15 | -    | -     | -0,12 | 0,39 | 0,39 | - | 0,48 | 0,69 | x    |

„-“no statistically significant relationship,  $p>0,05$

Table S 1. The value of the  $\rho$ -Spearman coefficient for the relationship between individual attitudes of caretakers who administer dietary supplements to children (N=292)

|               |                                                                                    | 1                                                                   | 2                                                               | 3                                                | 4                                                                                  | 5                                                      | 6                                                                                  | 7                                                                                        | 8                                                                                                                        | 9                                                                       | 10                                                                                          | 11                                                                                |
|---------------|------------------------------------------------------------------------------------|---------------------------------------------------------------------|-----------------------------------------------------------------|--------------------------------------------------|------------------------------------------------------------------------------------|--------------------------------------------------------|------------------------------------------------------------------------------------|------------------------------------------------------------------------------------------|--------------------------------------------------------------------------------------------------------------------------|-------------------------------------------------------------------------|---------------------------------------------------------------------------------------------|-----------------------------------------------------------------------------------|
| Statement (S) |                                                                                    | I have general knowledge on the subject of DS intended for children | In my opinion dietary supplement is an equivalent of medication | Dietary supplements are foodstuff (type of food) | DS (ingredients of DS) can interact with medication and food consumed by the child | Dietary supplements can cause side effects in children | Taking dietary supplements in recommended doses is safe for the health of children | Administering dietary supplements to children can be one way of supplementing their diet | Taking DS in an uncontrollable manner (by children) can lead to an overdose of vitamins and minerals or other substances | Dietary supplements intended for children can have medicinal properties | Selected dietary supplements intended for children are effective in flu and cold prevention | Taking dietary supplements (by children) during illness can shorten its duration. |
| 1             | I have general knowledge on the subject of DS intended for children                | x                                                                   | -                                                               | 0,12                                             | -                                                                                  | -                                                      | 0,24                                                                               | 0,19                                                                                     | -                                                                                                                        | 0,20                                                                    | 0,12                                                                                        | -                                                                                 |
| 2             | In my opinion dietary supplement is an equivalent of medication                    | -                                                                   | x                                                               | -                                                | -0,13                                                                              | -0,12                                                  | -                                                                                  | -                                                                                        | -                                                                                                                        | 0,26                                                                    | 0,12                                                                                        | -                                                                                 |
| 3             | Dietary supplements are foodstuff (type of food)                                   | 0,12                                                                | -                                                               | x                                                | -                                                                                  | -                                                      | -                                                                                  | -                                                                                        | -                                                                                                                        | 0,12                                                                    | -                                                                                           | -                                                                                 |
| 4             | DS (ingredients of DS) can interact with medication and food consumed by the child | -                                                                   | -0,13                                                           | -                                                | x                                                                                  | 0,54                                                   | -0,13                                                                              | -                                                                                        | 0,40                                                                                                                     | -                                                                       | -0,16                                                                                       | -                                                                                 |
| 5             | Dietary                                                                            | -                                                                   | -0,12                                                           | -                                                | 0,53                                                                               | x                                                      | -0,15                                                                              | -                                                                                        | 0,36                                                                                                                     | 0,14                                                                    | -0,12                                                                                       | -                                                                                 |

|    |                                                                                                                          |      |      |   |       |       |      |      |   |      |      |      |
|----|--------------------------------------------------------------------------------------------------------------------------|------|------|---|-------|-------|------|------|---|------|------|------|
|    | supplements can cause side effects in children*                                                                          |      |      |   |       |       |      |      |   |      |      |      |
| 6  | Taking dietary supplements in recommended doses is safe for the health of children                                       | 0,24 | -    | - | -0,13 | -0,15 | x    | 0,48 | - | 0,22 | 0,39 | 0,33 |
| 7  | Administering DS to children can be one way of supplementing their diet                                                  | 0,19 | -    | - | -     | -     | 0,48 | x    | - | 0,26 | 0,36 | 0,30 |
| 8  | Taking DS in an uncontrollable manner (by children) can lead to an overdose of vitamins and minerals or other substances | -    | -    | - | 0,40  | 0,36  | -    | -    | x | -    | -    | -    |
| 9  | DS intended for children can have medicinal properties*                                                                  | 0,20 | 0,26 | - | -     | 0,14  | 0,22 | 0,26 | - | x    | 0,42 | 0,41 |
| 10 | Selected DS intended for children are effective in flu and cold prevention                                               | 0,12 | 0,12 | - | -0,16 | -0,12 | 0,39 | 0,36 | - | 0,42 | x    | 0,59 |

|    |                                                                  |   |   |   |   |   |      |      |   |      |      |   |
|----|------------------------------------------------------------------|---|---|---|---|---|------|------|---|------|------|---|
| 11 | Taking DS (by children) during illness can shorten its duration. | - | - | - | - | - | 0,33 | 0,30 | - | 0,41 | 0,59 | x |
|----|------------------------------------------------------------------|---|---|---|---|---|------|------|---|------|------|---|

„-“ no statistically significant relationship  $p > 0,05$
